# Supplementary material for: Enhancement of photo-Fenton catalytic activity with the assistance of oxalic acid on the kaolin–FeOOH system for the degradation of organic dyes
Source: Royal Society of Chemistry journal article supplement (doi:10.1039/d0ra03361h), 2020-01-01
Supplement: d0ra03361h1.pdf [file d0ra03361h1.pdf]

## **Supporting Information for**

### **Enhancement of photo-Fenton catalytic activity with the assistance of Oxalic acid on the Kaolin-FeOOH system for degradation of organic dyes**

Chun Xiao, Su Li, Fuhao Yi, Bo Zhang\*, Dan Chen, Yang Zhang, Hongxin Chen and Yueli Huang

*College of Environmental and Chemical Engineering, Zhaoqing University, Zhaoqing, 526061, China*

\*Corresponding author: E-mail: david\_zhang200309@163.com

## Supplementary Figures

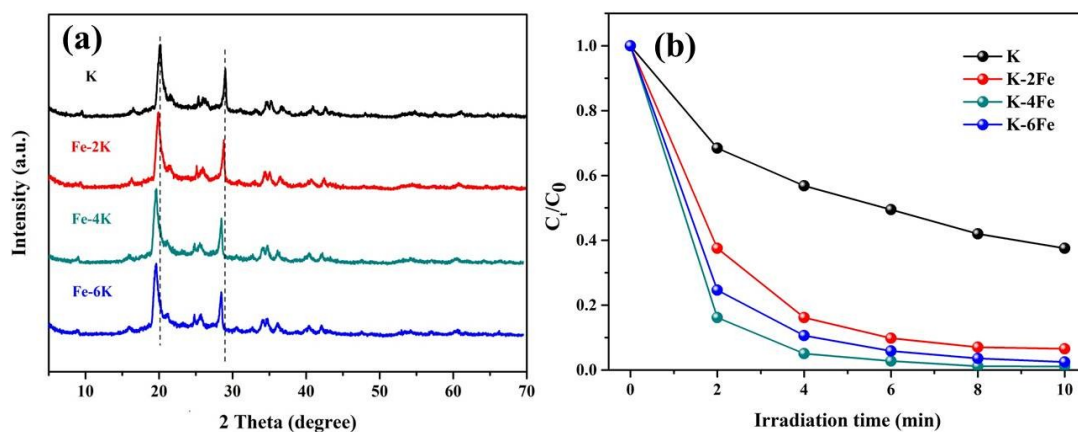

**Fig. S1** (a) XRD patterns of the K-xFe catalyst samples ( $x=0, 2, 4, 6$ ), (b) the RhB degradation of the K-xFe catalyst samples ( $x=0, 2, 4, 6$ ) ((catalysts) = 1.0 g/L, pH = 7.2, (oxalic acid) = 1.0 mM, ( $H_2O_2$ ) = 0.5 mM).

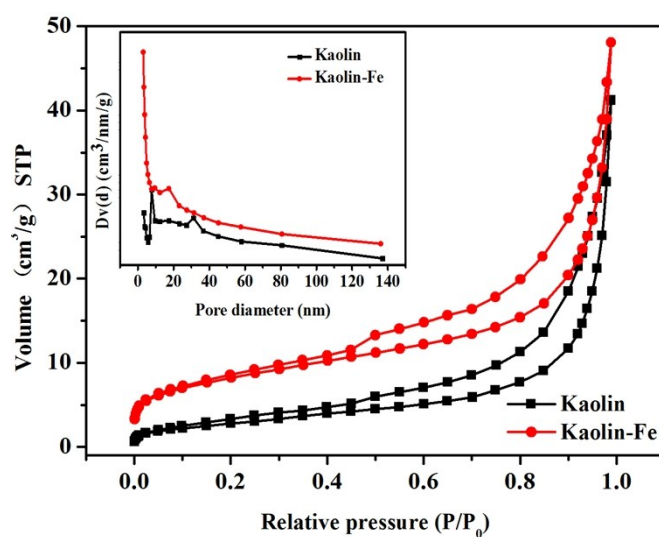

**Fig. S2**  $N_2$  adsorption-desorption isotherms of the kaolin and K-Fe.

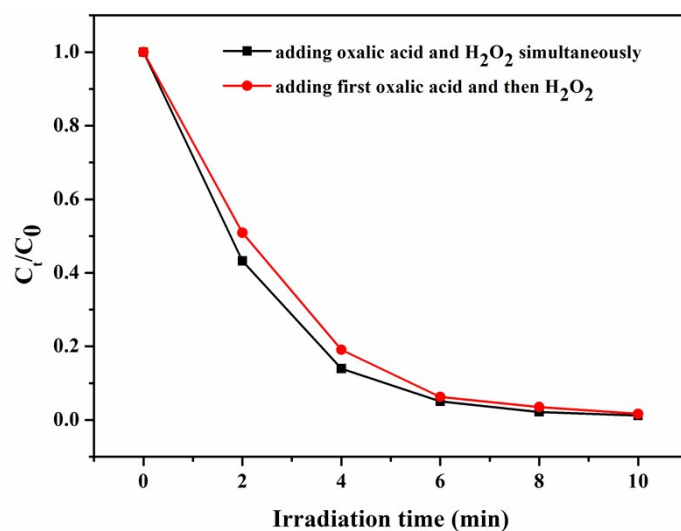

**Fig. S3** The effect of the adding order of H<sub>2</sub>O<sub>2</sub> and oxalic acid on the degradation of RhB ((K-Fe) = 1.0 g/L, pH = 7.2, (oxalic acid) = 1.0 mM, (H<sub>2</sub>O<sub>2</sub>) = 0.5 mM).

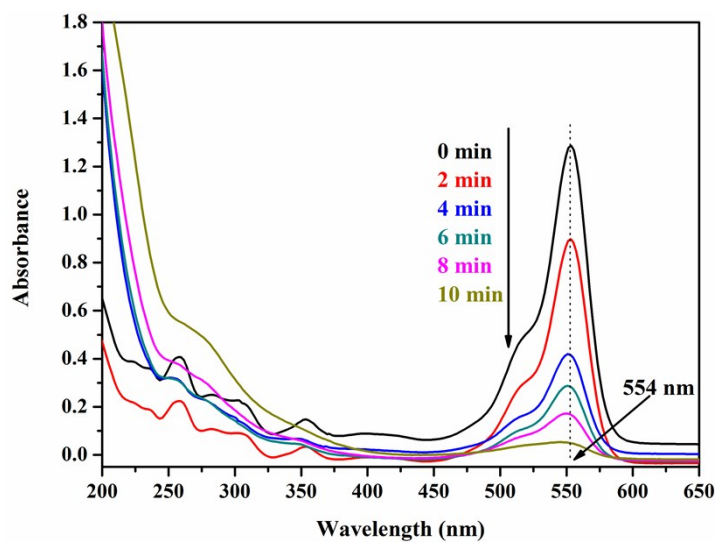

**Fig. S4** UV-vis absorption spectra of RhB of different irradiation time over the K-Fe catalyst ((K-Fe) = 1.0 g/L, pH = 7.2, (oxalic acid) = 1.0 mM, (H<sub>2</sub>O<sub>2</sub>) = 0.5 mM).

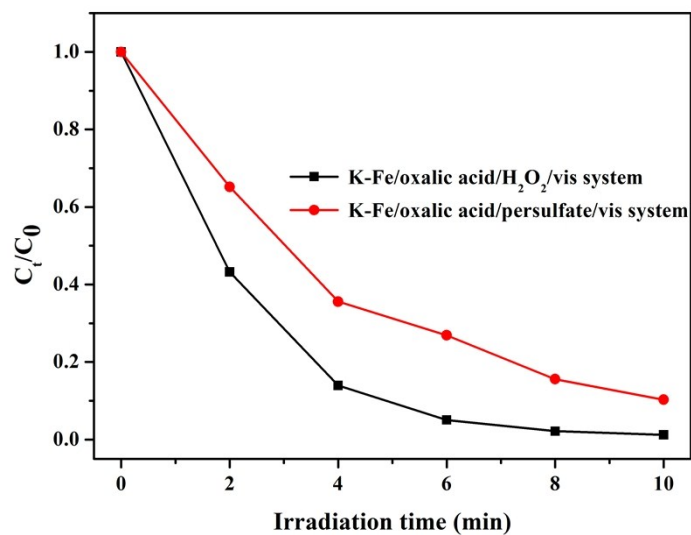

**Fig. S5** The effect of different oxidants on the degradation of RhB ((K-Fe) = 1.0 g/L, pH = 7.2, (oxalic acid) = 1.0 mM, (H<sub>2</sub>O<sub>2</sub> or persulfate) = 0.5 mM).

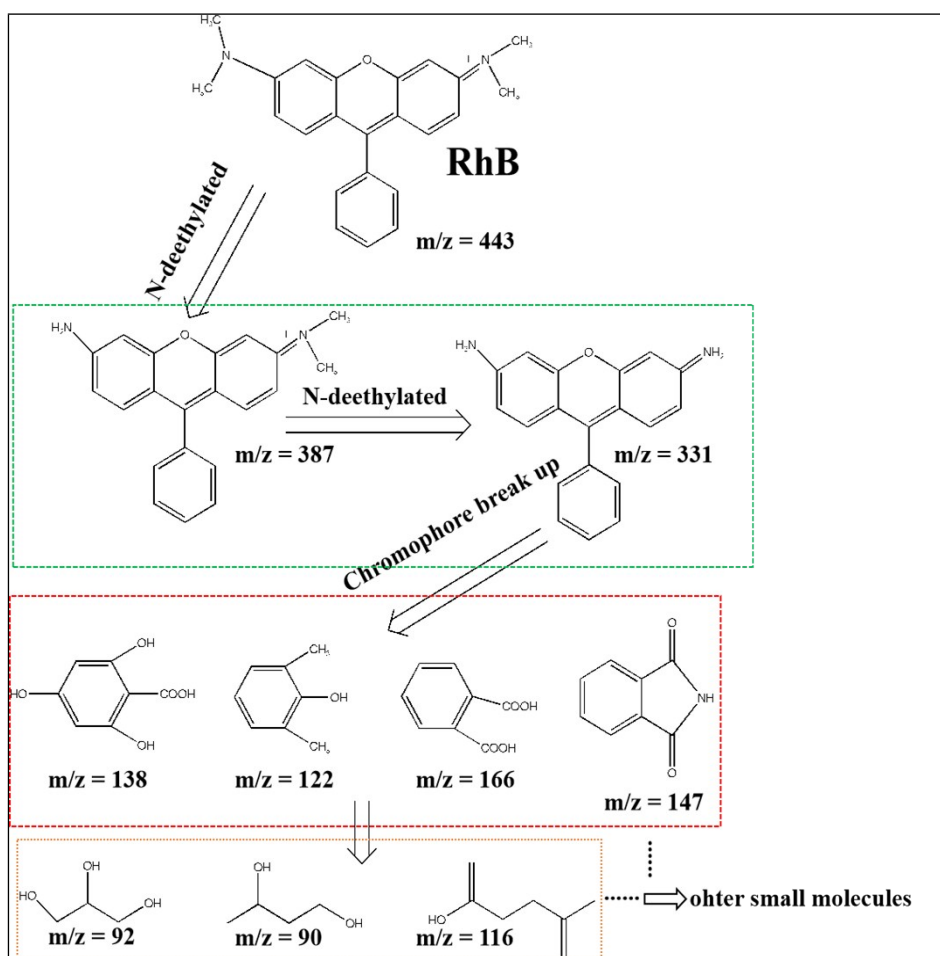

**Fig.S6** A possible degradaiton pathways of RhB in K-Fe/oxalic acid/H<sub>2</sub>O<sub>2</sub>/vis system.

**Table S1** The variation of pH value at different irradiation time.

| Irradiation time (min) |     | The pH value of the solution |     |     |      |  |
|------------------------|-----|------------------------------|-----|-----|------|--|
| 0                      | 3.3 | 5.7                          | 7.2 | 9.6 | 10.8 |  |
| 2                      | 2.6 | 3.9                          | 5.6 | 7.2 | 8.0  |  |
| 4                      | 2.8 | 4.2                          | 5.2 | 6.3 | 6.9  |  |
| 6                      | 3.3 | 4.4                          | 4.9 | 6.1 | 6.3  |  |
| 8                      | 3.5 | 4.3                          | 4.7 | 5.9 | 6.4  |  |
| 10                     | 3.4 | 4.2                          | 4.6 | 5.8 | 6.2  |  |
